# Supplementary material
Source: Springer Nature journal article supplement (https://www.springermedizin.de/resource/supplementary/12914_2011_184_MOESM1_ESM.pdf/9536912)
Supplement: MOESM1 [file 9536912]

**GOVERNANCE**

**MEDICINES and  
TECHNOLOGIES**

**INFORMATION**

**PEOPLE**

**HUMAN  
RESOURCES**

**FINANCING**

**SERVICE  
DELIVERY**
